# Supplementary material for: Functional Characterization of Lycopene Epsilon-Cyclase Genes in Nicotiana Tabacum
Source: Research Square preprint supplement (doi:10.21203/rs.3.rs-629327/v1), 2021-08-26
Supplement: Supplementary file 1 [file 0c9c63f6124a403ead72a1a0.docx]

**Sequence data**

>Sequencing verification result of WT for *Ntε-LCY1*

GGGTCGTACGTATAACGACTCACTATAGGGCGACATATGATCGATGATATCCCATGGGCGGCCGCCTGCAGACCAGGTCTACATACCAAACAGTCAATAAGAAATAATAACTAATCCCAACATAACTAATCCCACTATAACTAATCACACCATAACTGATCCTGACATAACTTGTCTTCAAACCAAACGACCCCTTAATGTATACAAGTTAAATCCTTTTAAATATGGGATCAAGAAAATCACCTTATCAGAAAGCTTAGACTGTGGATCCATGTCTTTATTCTGCTGCATTTGAACAAAAACAAGTTCTGAACCACCAGCTTTTATATAATCTTCTTCATCAGCAAAATCTTCTTTAACCACTACACAACTATCACTTCCACTACACTTCACTTTCATATGTATAGGCCAAAATGGTTGCTTTTTTCTTGGCATAATTCTCTTTCTTCCTAATGATTTGAAAAGACTGGAGATCTGGATCCCTCGAGTCTAGAGTCGACCTGCAGGCATGCAAGCTTGGCGTAATCATGGTCATAGCTGTTTCCTGTGTGAAATTGTTATCCGCTCACAATTCCACACAACATACGAGCCGGAAGCATAAAGTGTAAAGCCTGGGGTGCCTAATGAGTGAGCTAACTCACATTAATTGCGTTGCGCTCACTGCCCGCTTTCCAGTCGGGAAACCTGTCGTGCCAGCTGCATTAATGAATCGGCCAACGCGCGGGGAGAGGCGGTTTGCGTATTGGGCGCTCTTCCGCTTCCTCGCTCACTGACTCGCTGCGCTCGGTCGTTCGGCTGCGGCGAGCGGTATCAGCTCACTCAAAGGCGGTAATACGGTTATCCACAGAATCAGGGGATAACGCAGGAAAGAACATGTGAGCAAAAGGCCAGCAAAAGGCCAGGAACCGTAAAAAGGCCGCGTTTGCTGGCGTTTTTCCATAGGCTCCGCCCCCCTGACGAGCATCACAAAAATCGACGCTCAAGTCAAAGGGGGCGAAACCCGACGGGCCTTTAA

>Sequencing verification result of bacterial liquid for *ntε-lcy1-1*

NGTACACTCTATTAGGGCGATTGGGCCCTCTAGATGCATGCTCGAGCGGCCGCCAGTGTGATGGATATCTGCAGAATTGCCCTTTTCAAATCATTAGGAAGAAAGAGAATTATGCCAAGAAAAAAGCAACCATTTTGGCCTATACATATGAAAGTGAAGTGTAGTGGAAGTGATAGTTGTTAGTGGTTAAAGAAGATTTTGCTGATGAAGAAGATTATATAAAAGCTGGTGGTTCAGAACTTGTTTTTGTTCAAATGCAGCAGAATAAAGACATGGATCTACAGTCTAAGCTTTCTGATAAGGTGATTTTCTTGATCCCATATTTAAAAGGATTTGACTTGTATACATTAAGGGGTCGTTTGGTTTGAAGACAAGTTATGTCAGGATCAGTTATGGTGTGATTAGTTATAGTGGGATTAGTTATGTTGGGATTAGTTATTATTTCTTATTGACTGTTTGGTATGTAAGGGCAATTCCAGCACACTGGCGGCCGTTACTAGTGGATCCGAGCTCGGTACCAAGCTTGGCGTAATCATGGTCATAGCTGTTTCCTGTGTGAAATTGTTATCCGCTCACAATTCCACACAACATACGAGCCGGAAGCATAAAGTGTAAAGCCTGGGGTGCCTAATGAGTGAGCTAACTCACATTAATTGCGTTGCGCTCACTGCCCGCTTTCCAGTCGGGAAACCTGTCGTGCCAGCTGCATTAATGAATCGGCCAACGCGCGGGGAGAGGCGGTTTGCGTATTGGGCGCTCTTCCGCTTCCTCGCTCACTGACTCGCTGCGCTCGGTCGTTCGGCTGCGGCGAGCGGTATCAGCTCACTCAAAGGCGGTAATACGGTTATCCACAGAATCAGGGGATAACGCAGGAAAGAACATGTGAGCAAAAGGCCAGCAAAAGGCCAGGAACCGTAAAAAGGCCGCGTTGCTGGCGTTTTCCATAGGCTCCGCCCCCCTGACGAGCATCACAAAAATCGACGCTCAAGTCAAAGGTGGCGAAACCCGACAGGACTATAAAGA

>Sequencing verification result of bacterial liquid for *ntε-lcy1-2*

GGCTGATCGACGTATACGACTCACTATAGGGCGACATATGATCGATGATATCCCATGGGCGGCCGCCTGCAGACCAGGTCTTCAAATCATTAGGAAGAAAGAGAATTATGCCAAGAAAAAAGCAACCATTTTGGCCTATACATATGAAAGTGAAGTGTAGTGGAAGTGATAGTTGTGATAGTGGTTAAAGAAGATTTTGCTGATGAAGAAGATTATATAAAAGCTGGTGGTTCAGAACTTGTTTTTGTTCAAATGCAGCAGAATAAAGACATGGATCTACAGTCTAAGCTTTCTGATAAGGTGATTTTCTTGATCCCATATTTAAAAGGATTTAACTTGTATACATTAAGGGGTCGTTTGGTTTGAAGACAAGTTATGTCAGGATCAGTTATGGTGTGATTAGTTATAGTGGGATTAGTTATGTTGGGATTAGTTATTATTTCTTATTGACTGTTTGGTATGTAAGACTGGAGATCTGGATCCCTCGAGTCTAGAGTCGACCTGCAGGCATGCAAGCTTGGCGTAATCATGGTCATAGCTGTTTCCTGTGTGAAATTGTTATCCGCTCACAATTCCACACAACATACGAGCCGGAAGCATAAAGTGTAAAGCCTGGGGTGCCTAATGAGTGAGCTAACTCACATTAATTGCGTTGCGCTCACTGCCCGCTTTCCAGTCGGGAAACCTGTCGTGCCAGCTGCATTAATGAATCGGCCAACGCGCGGGGAGAGGCGGTTTGCGTATTGGGCGCTCTTCCGCTTCCTCGCTCACTGACTCGCTGCGCTCGGTCGTTCGGCTGCGGCGAGCGGTATCAGCTCACTCAAAGGCGGTAATACGGTTATCCACAGAATCAGGGGATAACGCAGGAAAGAACATGTGAGCAAAAGGCCAGCAAAAGGCCAGGAACCGTAAAAAGGCCGCGTTGCTGGCGTTTTCCATAGGCTCCGCCCCCTGACGAGATCACAAAATCGACGCTCAAGTCAAAGGGGCCAAACCCGACAGGACTATAAGATACCAGGCGTTTCCCCTGGAAGTCCCTCGGGGGTT

>Sequencing verification result of WT for *Ntε-LCY2*

GGCACTTGGCGAGCTCGGATTCCACTAGTAACGGCCGCCAGTGTGCTGGAATTGCCCTTAACAACAACATCGTGTAATCTCATAAGTGGGTTCTGGGGAAGGTAGTGAGTACGTAACCTTACTCCTACATTGTGCAGGTAAATAGACTGTTTCCGATAGATATATGCATGAGCACTGGATCTGTCATTATTGGTTTTGAGGTTTTTGATACTCAACTTGGTTTTTCACTGCAAAATTGATGTTTAGGATATGATATTCCAGGCTAAAATTACTCTCCAAACTTCATATGCTTAATACTTTCTTTTTTCAGATCTTGGGCTTCAAGCGTGCATTGAACATGTTTGGAGGGATACCATAGTATATCTTGACGATGCCGATCCAATTCTTATCGGTCGTGCTTATGGAAGAGTTAGTCGCCATTTAAGGGCAATTCTGCAGATATCCATCACACTGGCGGCCGCTCGAGCATGCATCTAGAGGGCCCAATTCGCCCTATAGTGAGTCGTATTACAATTCACTGGCCGTCGTTTTACAACGTCGTGACTGGGAAAACCCTGGCGTTACCCAACTTAATCGCCTTGCAGCACATCCCCCTTTCGCCAGCTGGCGTAATAGCGAAGAGGCCCGCACCGATCGCCCTTCCCAACAGTTGCGCAGCCTGAATGGCGAATGGACGCGCCCTGTAGCGGCGCATTAAGCGCGGCGGGTGTGGTGGTTACGCGCAGCGTGACCGCTACACTTGCCAGCGCCCTAGCGCCCGCTCCTTTCGCTTTCTTCCCTTCCTTTCTCGCCACGTTCGCCGGCTTTCCCCGTCAAGCTCTAAATCGGGGGCTCCCTTTAGGGTTCCGATTTAGTGCTTTACGGCACCTCGACCCCAAAAAACTTGATTAGGGTGATGGTTCACGTAGTGGGCCATCGCCCTGATAGACGGTTTTTCGCCCTTTGACGTTGGAGTCCACGTTCTTTAATAGTGGACTCTTGTTCCAACTGGAACAACACTCAACCCTATCTCGGTCTATTCTTTTGATTTATAAGGGATTTTGCCGATTTCGGCCTATTGGTTAAAAAATGAGCTGATTTACCAAAATTTAACGCGAATTTTACCAAATTCAGGGCC

>Sequencing verification results of bacterial liquid for *ntε-lcy2-1*

GGTACACTACTATTAGGGCGATTGGGCCTCTAGATGCATGCTCGAGCGGCCGCCAGTGTGATGGATATCTGCAGAATTGCCCTTAAATGGCGACTAACTCTTCCATAAGCACGACCGATAAGAATTGGATCGGCATCGTCAAGATATACTATGGTATAAGCATATGAAAAAAGAAATGCACGCTTGAAGCCCAAGATCTGAAAAAAGAAAGTATTAAGCATATGAAGTTTGGAGAGTAATTTTAGCCTGGAATATCATATCCTAAACATCAATTTTGCAGTGAAAAACCAAGTTGAGTATCAAAAACCTCAAAACCAATAATGACAGATCCAGTGCTCATGCATATATCTATCGGAAACAGTCTATTTACCTGCACAATGTAGGAGTAAGGTTACGTACTCACTACCTTCCCCAGAACCCACTTATGAGATTACACGATGTTGTTGTTAAGGGCAATTCCAGCACACTGGCGGCCGTTACTAGTGGATCCGAGCTCGGTACCAAGCTTGGCGTAATCATGGTCATAGCTGTTTCCTGTGTGAAATTGTTATCCGCTCACAATTCCACACAACATACGAGCCGGAAGCATAAAGTGTAAAGCCTGGGGTGCCTAATGAGTGAGCTAACTCACATTAATTGCGTTGCGCTCACTGCCCGCTTTCCAGTCGGGAAACCTGTCGTGCCAGCTGCATTAATGAATCGGCCAACGCGCGGGGAGAGGCGGTTTGCGTATTGGGCGCTCTTCCGCTTCCTCGCTCACTGACTCGCTGCGCTCGGTCGTTCGGCTGCGGCGAGCGGTATCAGCTCACTCAAAGGCGGTAATACGGTTATCCACAGAATCAGGGGATAACGCAGGAAAGAACATGTGAGCAAAAGGCCAGCAAAAGGCCAGGAACCGTAAAAAGGCGCGTTGCTGGCGTTTTCCATAGGCTCCGCCCCCTGACGACATCACAAAATCGACGCTCAAGTCAAAGGGGCGAAACCCGACAGACTATAAAGAACCAGGCGTTTCCCCTGGAAGCTCCCTCGGGCGTCTCCTGTTCCGACCTGCCGTTA

>Sequencing verification results of bacterial liquid for *ntε-lcy2-2*

GGTACGACTCTATAGGGCGATTGGGCCTCTAGATGCAATGCTCGAGCGGCCGCCAGTGTGATGGATATCTGCAGAATTGCCCTTAACAACAACATCGTGTAATCTCATAAGTGGGTTCTGGGGAAGGTAGTGAGTACGTAACCTTACTCCTACATTGTGCAGGTAAATAGACTGTTTCCGATAGATATATGCATGAGCACTGGATCTGTCATTATTGGTTTTGAGGTTTTTGATACTCAACTTGGTTTTTCACTGCAAAATTGATGTTTAGGATATGATATTCCAGGCTAAAATTACTCTCCAAACTTCATATGCTTAATACTTTCTTTTTTCAGATCTTGGGCTTCAAGCGTGCATTGAACATGTTGGAGGGATACCATAGTATATCTTGACGATGCCGATCCAATTCTTATCGGTCGTGCTTATGGAAGAGTTAGTCGCCATTTAAGGGCAATTCCAGCACACTGGCGGCCGTTACTAGTGGATCCGAGCTCGGTACCAAGCTTGGCGTAATCATGGTCATAGCTGTTTCCTGTGTGAAATTGTTATCCGCTCACAATTCCACACAACATACGAGCCGGAAGCATAAAGTGTAAAGCCTGGGGTGCCTAATGAGTGAGCTAACTCACATTAATTGCGTTGCGCTCACTGCCCGCTTTCCAGTCGGGAAACCTGTCGTGCCAGCTGCATTAATGAATCGGCCAACGCGCGGGGAGAGGCGGTTTGCGTATTGGGCGCTCTTCCGCTTCCTCGCTCACTGACTCGCTGCGCTCGGTCGTTCGGCTGCGGCGAGCGGTATCAGCTCACTCAAAGGCGGTAATACGGTTATCCACAGAATCAGGGGATAACGCAGGAAAGAACATGTGAGCAAAAGGCCAGCAAAAGGCCAGGAACCGTAAAAAGGCCGCGTTGCTGGCGTTTTCCATAGGCTCCGCCCCCCTGACGAGCATCACAAAAATCGACGCTCAAGTCAGAGGTGGCGAAACCCGACAGGACTATAAAGATACCAGGCGTTTCCCCCTGGAAGCTCCCTCGTGCGTCTCCTGTTCCACCCTGCCGTTACCGGATAC
